# Supplementary material
Source: ML conference proceedings conference paper supplement (https://openaccess.thecvf.com/content/CVPR2023/html/Yu_ANetQA_A_Large-Scale_CVPR_2023_paper.html)
Supplement: Supplementary file 1 [file Yu_ANetQA_A_Large-Scale_CVPR_2023_supplemental.pdf]

# ANetQA: A Large-scale Benchmark for Fine-grained Compositional Reasoning over Untrimmed Videos—Supplementary Material

Zhou Yu<sup>1</sup> Lixiang Zheng<sup>1</sup> Zhou Zhao<sup>2</sup> Fei Wu<sup>2</sup> Jianping Fan<sup>1,3</sup> Kui Ren<sup>4</sup> Jun Yu<sup>1\*</sup>

<sup>1</sup> School of Computer Science, Hangzhou Dianzi University, China.

<sup>2</sup> College of Computer Science and Technology, Zhejiang University, China

<sup>3</sup> AI Lab at Lenovo Research, China

<sup>4</sup> School of Cyber Science and Technology, Zhejiang University, China

{yuz, lxzheng, yujun}@hdu.edu.cn, {zhaozhou, wufei, kuiren}@zju.edu.cn, jfan1@lenovo.com

## A. Scene Graph Annotations

### A.1. Annotation Pipeline

As mentioned in the main paper, ANetQA is built upon the annotations of ANet-Entities [6], which grounds objects in representative frames with noun phrases (NPs). Nouns and adjectives are extracted from these NPs using the Stanford Parser [4] to form our initial object and attribute vocabularies, respectively. Meanwhile, we handcraft the initial relationship vocabulary on the activity labels of the original ActivityNet [1]. These initial vocabularies are intermittently updated during the annotation process.

We provide a web-based interface shown in Figure 1 for crowdsourcing. In total, more than 50 human annotators have participated in the annotation process for over 4 months. Each annotator is asked to watch the video first and then select attributes, and relationships from the corresponding vocabularies. When no suitable option is available, they are allowed to add a new option. These new options will be manually checked and the valid ones will be added to the vocabularies intermittently. Meanwhile, the mislabeled objects and inaccurate object bounding boxes are fixed and omitted key objects are complemented during the annotation process. To control the annotation costs, we set the maximum number of augmented objects to three.

### A.2. Scene Graph Taxonomies

Our completed scene graph annotations include taxonomies of 2,072 object classes, 86 relationship classes, and 618 attributes classes. The detail taxonomies for objects, relationships, and attributes are shown in Table 1, Table 2, and Figure 2, respectively. As our actions are depicted in natural language, we illustrate a word cloud for the most frequent verbs in Figure 3.

\*Jun Yu is the corresponding author

## A.3. Case Study

In Figure 4, we provide comparative examples of the annotated scene graphs from ANetQA and AGQA, respectively. From the visualized results we can see that: (i) our scene graph is more informative than that in AGQA as our untrimmed video contains richer semantics with multiple switched scenarios; (ii) our scene graph is much more fine-grained than that in AGQA due to the objects, relationships, actions, especially the newly introduced attributes; (iii) our scene graph contains varied relationships between human-object, human-human, and object-object pairs, while the scene graph of AGQA only contains human-object relationships; and (iv) our scene graph uses the “*identical*” relationship to annotate the same instance across different frames, which effectively avoids the generation of ambiguous questions. In contrast, the scene graph of AGQA is centered on *one* person, which cannot always be satisfied in real-world videos. As shown at the bottom, the annotated “*person*” refers to the man in the first four frames and shifts to the boy in the last frame.

## B. Compositional QA Generation

### B.1. Taxonomies, Templates, and Programs

We show the question taxonomies and templates for our benchmark in Table 3. Similar to AGQA, each question type is categorized into different in terms of different perspectives (*i.e.*, structure, semantics, reasoning skill, and answer type). Each question type corresponds to at least one question template with a maximum number of reasoning steps. Compared with AGQA, ANetQA has more diverse question templates (119 *vs.* 28), showing the diversity, fine granularity, and difficulty of our benchmark. The functional program for each template is shown in Table 4.

## B.2. Question Distributions

ANetQA contains 13.4M balanced QA pairs in total. We display the distributions of these QA pairs in terms of different taxonomies in Figure 5. The results show that: (i) the question structure distribution meets the expectation of our balancing strategy; (ii) the attribute-related questions account for a large percentage in terms of question semantics and reasoning skills, respectively; and (iii) the proportion of the *open* type answers is roughly twice that of the *binary* type answers. In Figure 6, we illustrate the question distribution by the first three words. The results show that our questions are both semantically and linguistically diverse.

## B.3. Example QA pairs

We provide some example QA pairs from the `train` and `val` splits in Figure 7. Each example contains five QA pairs on the same video with different question structures (*i.e.*, query, verify, choose, compare, and logic). The examples verify that our questions are diverse, fine-grained, and challenging at the same time.

## C. Experiments

### C.1. Human Evaluation

As reported in the main paper, human performance tops out at 84.48% overall accuracy by taking the majority voting over five answers per question. In Figure 8, we provide more detailed analyses of the human evaluation statistics to better understand the behavior of individual annotators. The results in Figure 8a indicate that the deviations among different annotators do exist, and majority voting helps eliminate individual errors. The results in Figure 8b show that different question types lead to diverse accuracies and deviations.

### C.2. Val-and-test Consistency

In Table 5, we provide comparisons of the same model on the `val` and `test` split, respectively. The results show that there is no much difference between the performance on the two splits.

### C.3. Per-type Accuracy

In Table 6, we report the per-type accuracies of the three models. From the results we can see that the best-performing model All-in-one consistently outperforms the rest models in majority of the question types.

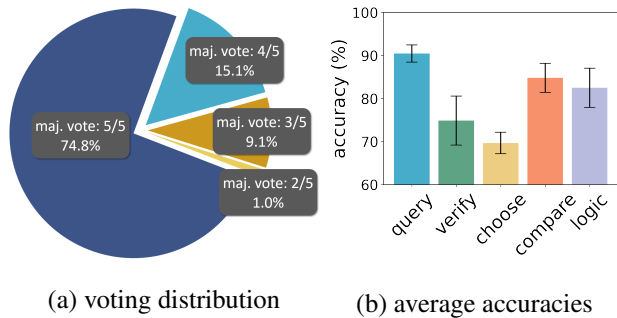

Figure 8. Given the predictions from five individual annotators, we illustrate (a) the distribution of the majority votes and (b) average accuracies with standard deviations in terms of different question structures and the overall type.

|      | HCRN [2] | ClipBERT [3] | All-in-one [5] |
|------|----------|--------------|----------------|
| val  | 41.69    | 44.34        | 45.44          |
| test | 41.15    | 43.92        | 44.53          |

Table 5. Comparative results of the three models on the `val` and `test` splits of ANetQA, respectively.

| type              | HCRN         | ClipBERT     | All-in-one   |
|-------------------|--------------|--------------|--------------|
| attrRelWhat       | 24.06        | 29.03        | <b>29.42</b> |
| attrWhat          | 21.95        | 26.58        | <b>28.75</b> |
| relWhat           | 16.35        | 14.59        | <b>16.94</b> |
| objRelWhere       | 15.78        | 16.81        | <b>16.21</b> |
| objRelWhat        | 19.60        | 19.36        | <b>22.23</b> |
| objWhere          | <b>16.34</b> | 14.25        | 15.39        |
| objWhat           | 39.10        | 39.39        | <b>40.11</b> |
| objExist          | 68.54        | 72.76        | <b>73.20</b> |
| objRelExist       | 68.00        | <b>71.85</b> | 70.92        |
| actExist          | 75.34        | <b>78.04</b> | 77.85        |
| objRelWhatChoose  | 67.09        | 67.96        | <b>69.13</b> |
| objWhatChoose     | 71.51        | 77.63        | <b>77.93</b> |
| attrRelWhatChoose | 56.14        | 64.60        | <b>65.74</b> |
| attrWhatChoose    | 57.92        | 65.90        | <b>66.89</b> |
| attrCompare       | <b>55.66</b> | 55.60        | 54.42        |
| attrSame          | 56.25        | <b>82.14</b> | 58.93        |
| actTime           | 67.24        | <b>70.44</b> | 56.16        |
| actLongerVerify   | 50.00        | 50.00        | <b>52.48</b> |
| actShorterVerify  | 49.79        | 49.79        | <b>50.83</b> |
| andObjRelExist    | 70.89        | 70.38        | <b>73.97</b> |
| xorObjRelExist    | 86.50        | <b>89.74</b> | 87.18        |

Table 6. Per-type accuracy of the three models on the `test` set.

| video id | segment id | frame id | object id |
|----------|------------|----------|-----------|
| 133      | 2          | 8        | 40628     |

### video

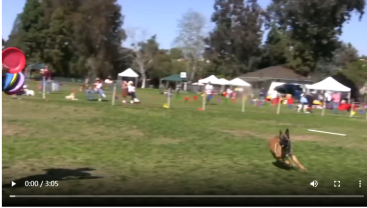

### all bboxes

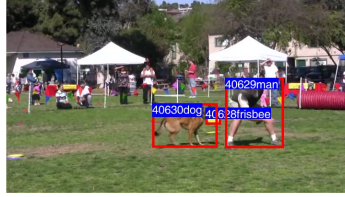

### current bbox

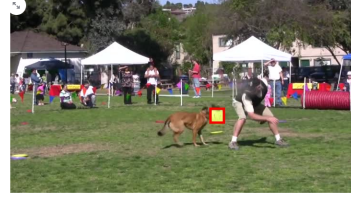

action duration: 118.87-182.95

current frame: 2:53

action captioning: He continues to roam around with the dog performing tricks with the dog and frisbee.

### basic information

object class: frisbee

class error

bbox: [415,227,32,33]

bbox error

is crowds: no

corwds error

### attributes

attribute class

person

| person class | hair               | hair color          | main hair color  | headwear color     | main headwear color | accessory        |
|--------------|--------------------|---------------------|------------------|--------------------|---------------------|------------------|
| boy          | none               | Choose an option    | none             | Choose an option   | none                | Choose an option |
| muti clothes | upper garment type | upper garment color | main upper color | lower garment type | lower garment color | main lower color |
| none         | none               | Choose an option    | none             | none               | Choose an option    | none             |
| skin color   | status             | location            | occupation       | nationality        |                     |                  |
| none         | Choose an option   | none                | none             | none               |                     |                  |

### relationships

| subject | object |
|---------|--------|
| 40628   | 40628  |

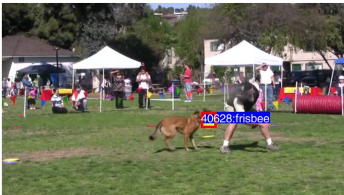

relationship number

2

| subject1 | object1 | relationship type1 | relationship1 |
|----------|---------|--------------------|---------------|
| 40630    | 40628   | action             | biting        |

preview : dog is biting frisbee

| subject2 | object2 | relationship type2 | relationship2 |
|----------|---------|--------------------|---------------|
| 40629    | 40630   | action             | playing with  |

preview : person is playing with dog

Figure 1. A web-based interface for video scene graph annotation by crowdsourcing. Annotators are asked to watch the video first and then select attributes and relationships from corresponding vocabularies. When no suitable item is available, they can add new items freely. These new items will be manually checked and the valid ones will be appended to the vocabularies intermittently.

|            |             |           |                    |               |              |            |            |
|------------|-------------|-----------|--------------------|---------------|--------------|------------|------------|
| hand       | car         | dog       | room               | water         | hair         | field      | table      |
| horse      | bike        | floor     | ground             | river         | boat         | rope       | board      |
| bar        | wall        | shoe      | hill               | arm           | bowl         | shirt      | face       |
| tree       | gym         | pool      | stage              | drum          | barbell      | cup        | skateboard |
| track      | clothes     | mat       | leg                | snow          | paper        | sink       | stick      |
| street     | brush       | tire      | tool               | court         | beach        | ingredient | head       |
| chair      | glass       | grass     | knife              | machine       | roof         | foot       | cat        |
| wood       | plate       | pole      | bottle             | road          | house        | ocean      | food       |
| beam       | mower       | bull      | hoop               | frisbee       | yard         | guitar     | box        |
| window     | wave        | kitchen   | towel              | sea           | pot          | football   | ski        |
| slope      | tube        | bucket    | nail               | bowling ball  | fence        | leaf       | dart       |
| pumpkin    | eye         | canoe     | pasta              | building      | tile         | drink      | rock       |
| lawn       | camel       | surfboard | lake               | slide         | rubik's cube | ice        | pinata     |
| pan        | contact len | kayak     | counter            | hat           | violin       | bow        | pit        |
| raft       | arena       | fish      | swing              | cake          | potato       | cigarette  | volleyball |
| park       | arrow       | saxophone | baton              | motorbike     | croquet      | racket     | cookie     |
| dodgeball  | carpet      | bread     | sandwich           | short sleeves | vacuum       | hockey     | hammer     |
| bag        | shovel      | area      | elliptical machine | javelin       | curling      | kite       | shot       |
| mirror     | tennis      | piano     | lemon              | mouth         | door         | sidewalk   | accordion  |
| line       | icecream    | shop      | shuffleboard       | table tennis  | lane         | stair      | body       |
| microphone | finger      | paint     | net                | harmonica     | helmet       | liquid     | water polo |
| discus     | product     | egg       | bathroom           | platform      | fire         | gun        | studio     |
| suit       | alcohol     | back      | paddle             | sand          | glove        | mop        | hole       |
| sofa       | stilt       | stand     | pin                | beer          | flute        | dish       | rag        |
| smoke      | scissors    | tattoo    | sky                | tomato        | razor        | vest       | basketball |

Table 1. A list of top-200 object classes in terms of occurrences in our benchmark. Sorted by row first.

| spatial  | near          | in          | on           | part of       |                   |              |
|----------|---------------|-------------|--------------|---------------|-------------------|--------------|
| temporal | identical     |             |              |               |                   |              |
| contact  | pulling       | holding     | touching     | fighting with | wearing           | hitting      |
|          | playing       | standing on | playing with | sweeping      | wiping            | sitting on   |
|          | spitting      | stirring    | eating       | jumping into  | taking picture of | driving      |
|          | riding        | leading     | throwing     | climbing      | leaning on        | covering     |
|          | lying on      | kneeling on | walking on   | raising       | biting            | hugging      |
|          | cutting       | running on  | jumping on   | squatting on  | trimming          | scraping     |
|          | carrying      | pushing     | brushing     | pointing at   | dancing with      | chasing      |
|          | surfing on    | polishing   | washing      | drinking from | stamping          | fishing      |
|          | speaking with | pouring     | drinking     | crossing      | dragging          | repairing    |
|          | smoking       | sliding on  | bowing to    | drawing on    | hanging on        | drawn on     |
|          | making        | flying from | drawing      | feeding       | poured into       | flowing from |
|          | kissing       | twisting    | writing on   | burning       | lighting          | pouring into |
|          | spraying      | commanding  | blowing      | heating       | pointing          | painting on  |
|          | painting      | painted on  | wirting on   |               |                   |              |

Table 2. A list of all the 86 relationships in our benchmark, including 4 spatial, 1 temporal, and 81 contact relationships. Sorted by row first in terms of occurrences.

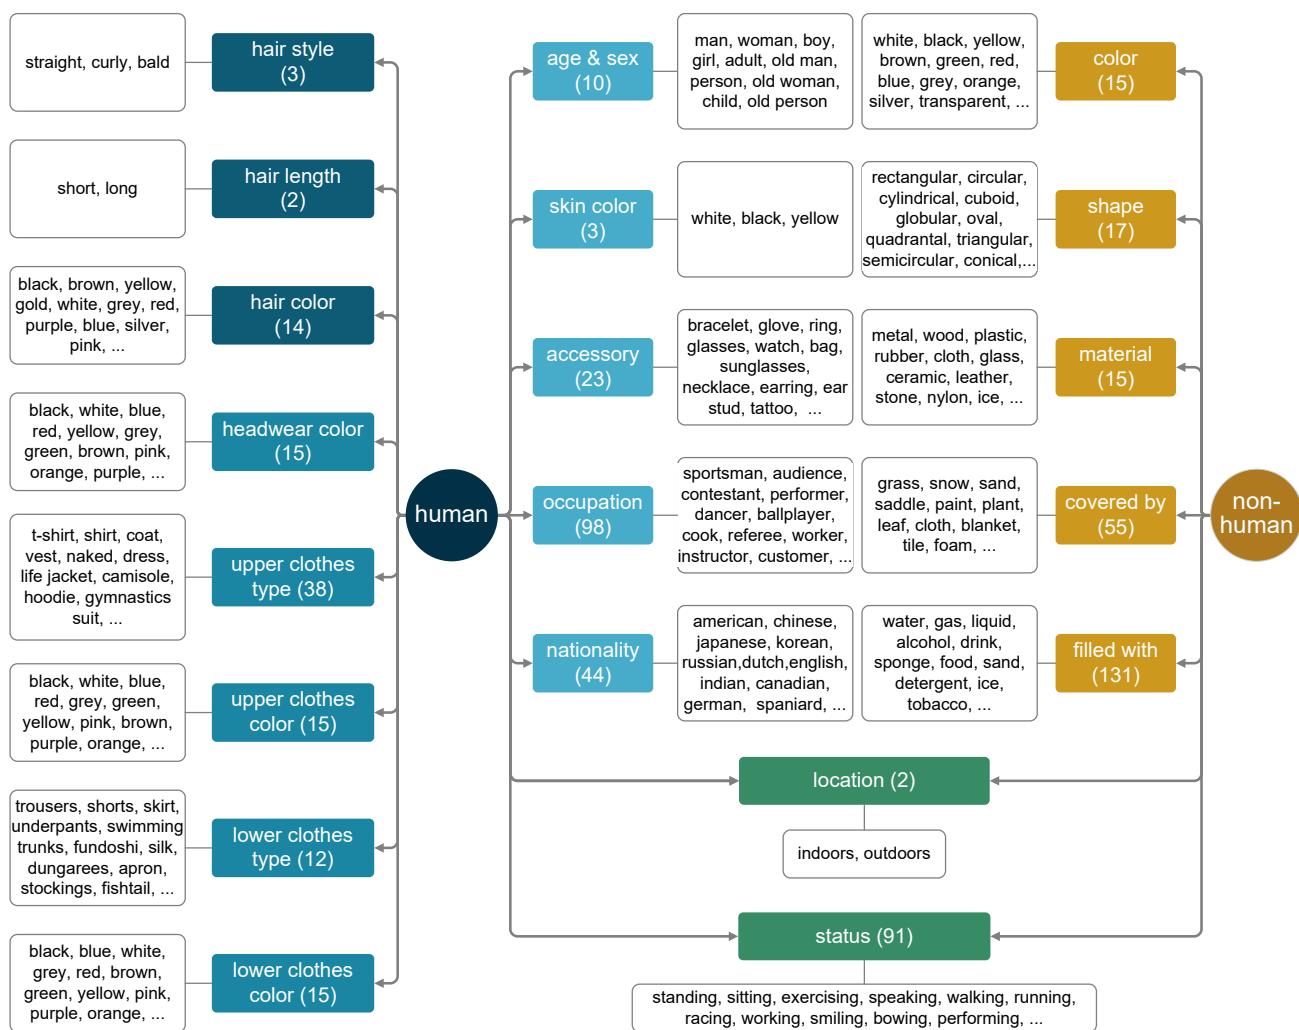

Figure 2. A hierarchy of attributes in our benchmark. The hierarchy consists of three levels. On the **top** level, objects are classified into the *human* and *non-human* groups. On the **middle** level, up to 20 representative attribute types are designed for each top groups (e.g., “*hair style*” and “*skin color*“ for the “*human*” group, “*shape*” and “*material*” for the “*non-human*” group). A few attributes like “*location*” and “*status*” are shared across the two groups. On the **bottom** level, a total number of 618 attribute labels are provided for all the middle-level attribute types (e.g., “*long hair*” and “*short hair*” for the “*hair length*” attribute type). For each object, annotators are asked to label the bottom-level attributes as thoroughly as possible. Due to space limitations, we show a maximum number of 10 bottom-level attributes for each mid-level attribute type.

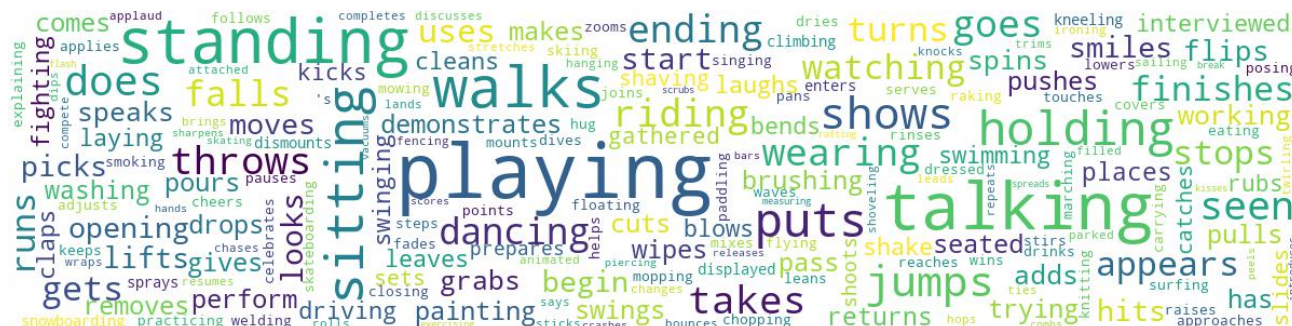

Figure 3. A word cloud for frequent *verbs* in action descriptions. We merge the words with the same etymon for better visualization.

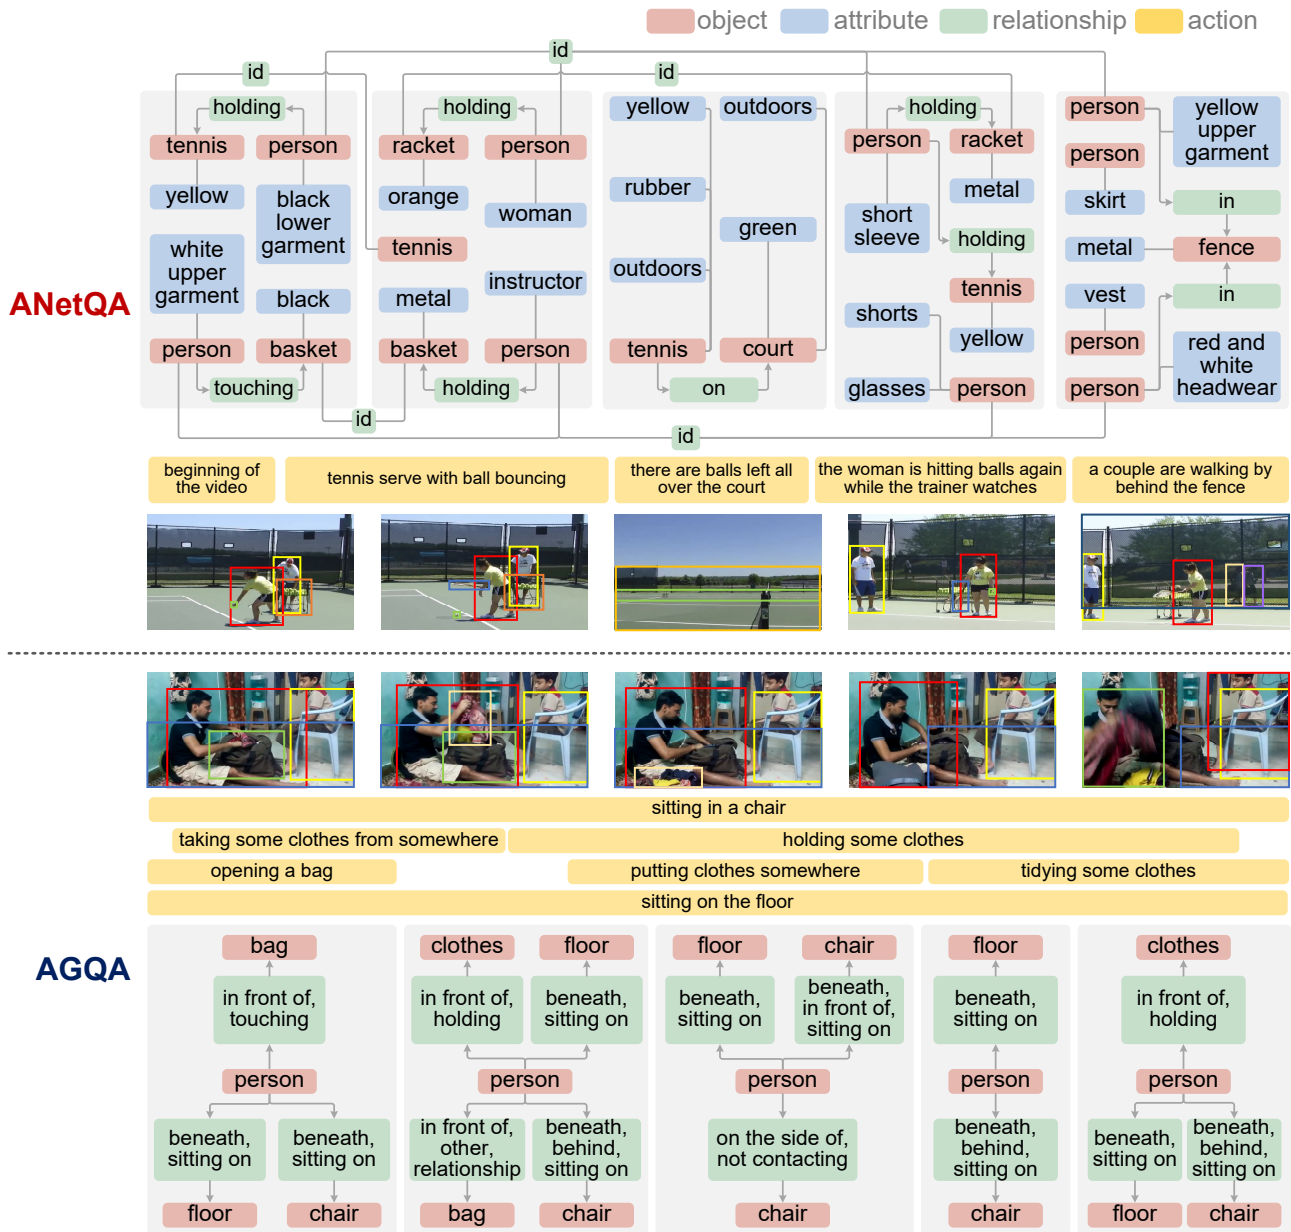

Figure 4. A comparison of the example scene graphs of our ANetQA and AGQA. The visualized results suggest: (i) our scene graph is more informative than that in AGQA as our untrimmed video contains richer semantics with multiple switched scenarios; (ii) our scene graph is much more fine-grained than that in AGQA due to the objects, relationships, actions, especially the newly introduced attributes; (iii) our scene graph contains varied relationships between human-object, human-human, and object-object pairs, while the scene graph of AGQA only contains human-object relationships; and (iv) our scene graph uses the “*identical*” relationship to annotate the same instance across different frames, which effectively avoids the generation of ambitious questions. In contrast, the scene graph of AGQA is centered on *one* person, which cannot always be satisfied in real-world videos. Specifically, the annotated “*person*” refers to the man in the first four frames and shifts to the boy in the last frame.

| type              | question structures | question semantics | reasoning skill         | answer types | reasoning steps | #templ. | question template                                                                           |
|-------------------|---------------------|--------------------|-------------------------|--------------|-----------------|---------|---------------------------------------------------------------------------------------------|
| attrRelWhat       | query               | attribute          | obj-attr,obj-rel        | open         | 5               | 15      | what [attr-type] is the [attr1] [obj1] [rel] [attr2] [obj2]?                                |
| attrWhat          | query               | attribute          | obj-attr                | open         | 3               | 15      | what [attr-type] is the [attr1] [obj1] that [attr2] [obj2] is [rel]?                        |
| relWhat           | query               | relationship       | obj-attr,obj-rel        | open         | 5               | 1       | what is the relationship between [attr1] [obj1] and [attr2] [obj2]?                         |
| objRelWhere       | query               | relationship       | obj-attr,obj-rel        | open         | 5               | 1       | where is the [attr1] [obj1] [rel] [attr2] [obj2]?                                           |
|                   |                     |                    |                         |              |                 | 1       | where is the [attr1] [obj1] that [attr2] [obj2] is [rel]?                                   |
| objRelWhat        | query               | object             | obj-attr, obj-rel       | open         | 5               | 1       | what is the [attr1] object [rel] [attr2] [obj2]?                                            |
|                   |                     |                    |                         |              |                 | 1       | what is the [attr1] object that [attr2] [obj2] is [rel]?                                    |
| objWhere          | query               | relationship       | obj-attr,obj-rel        | open         | 3               | 1       | where is the [attr] [obj]?                                                                  |
| objWhat           | query               | object             | obj-attr                | open         | 3               | 1       | what is [attr] object?                                                                      |
| objExist          | verify              | object             | exists,obj-attr         | binary       | 3               | 1       | does [attr] [obj] appear?                                                                   |
| objRelExist       | verify              | relationship       | exists,obj-attr,obj-rel | binary       | 5               | 1       | is [attr1] [obj1] [rel] [attr2] [obj2]?                                                     |
| actExist          | verify              | action             | exist                   | binary       | 2               | 1       | is someone [act]?                                                                           |
| objRelWhatChoose  | choose              | object             | obj-attr,obj-rel        | open         | 5               | 1       | which is [attr1] object [rel] [attr2] [obj2], [obj-A] or [obj-B]?                           |
|                   |                     |                    |                         |              |                 | 1       | which is [attr1] object that [attr2] [obj2] is [rel], [obj-A] or [obj-B]?                   |
| objWhatChoose     | choose              | object             | obj-attr                | open         | 3               | 1       | which is [attr] object, [obj-A] or [obj-B]?                                                 |
| attrRelWhatChoose | choose              | attribute          | obj-attr,obj-rel        | open         | 5               | 18      | which [attr-type] is the [attr1] [obj1] [rel] [attr2] [obj2], [attr-A] or [attr-B]?         |
|                   |                     |                    |                         |              |                 | 18      | which [attr-type] is the [attr1] [obj1] that [attr2] [obj2] is [rel], [attr-A] or [attr-B]? |
| attrWhatChoose    | choose              | attribute          | obj-attr                | open         | 3               | 18      | which [attr-type] is the [attr] [obj], [attr-A] or [attr-B]?                                |
| attrCompare       | compare             | attribute          | obj-attr                | binary       | 5               | 1       | is the [attr-type] of the [attr] [obj] the same as that of the [attr] [obj]?                |
| attrSame          | compare             | attribute          | obj-attr                | open         | 5               | 1       | what is the same attributes of [attr1] [obj1] and [attr2] [obj2]?                           |
| actTime           | compare             | action             | sequencing              | binary       | 5               | 1       | is someone [act] before or after [act]?                                                     |
| actLongerVerify   | compare             | action             | duration-comparison     | binary       | 5               | 1       | is the duration of someone [act1] for longer than the duration of [act2]?                   |
| actShorterVerify  | compare             | action             | duration-comparison     | binary       | 5               | 1       | is the duration of someone [act1] for shorter than the duration of [act2]?                  |
| andObjRelExist    | logic               | relationship       | exists,obj-attr,obj-rel | binary       | 8               | 1       | is [attr1] [obj1] [rel] [attr2] [obj2] and [attr3] [obj3]?                                  |
| xorObjRelExist    | logic               | relationship       | exists,obj-attr,obj-rel | binary       | 8               | 1       | is [attr1] [obj1] [rel] [attr2] [obj2] but not [attr3] [obj3]?                              |

Table 3. Question taxonomy and templates. A NetQA contains 21 types of questions generated from 119 templates. Each question type is categorized into different taxonomies (*i.e.*, structure, semantics, reasoning skill, and answer type), and refers to a maximum number of reasoning steps. Note that the reasoning skills of *sequencing* and *superlative* are optionally used in all the question types by inserting a clause starting with “before/after [act]” or “in the beginning/end of the video”. [attr-type] refers to a set of templates that ask different middle-level attribute types shown in Figure 2. Note that some attribute types may slightly deviate from the corresponding template (*e.g.*, “*what is the occupation of ...*” or “*what are the accessories of ...*”). Due to space limitations, we do not expand all the templates and only show the most commonly-used one for those question types with multiple templates.

| template                                                                                    | functional program                                                                                                   |
|---------------------------------------------------------------------------------------------|----------------------------------------------------------------------------------------------------------------------|
| what [attr-type] is the [attr1] [obj1] [rel] [attr2] [obj2]?                                | select:[obj2]→filter:[attr2]→relate:[obj1],[rel]                                                                     |
| what [attr-type] is the [attr2] [obj2] that [attr1] [obj1] is [rel]?                        | →filter:[attr1]→query:<[attr-type]>                                                                                  |
| what [attr-type] is the [attr] [obj]?                                                       | select:[obj]→filter:[attr]→query:<[attr-type]>                                                                       |
| what is the relationship between [attr1] [obj1] and [attr2] [obj2]?                         | select:[obj1]→filter:[attr1]→select:[obj2]<br>→filter:[attr2]→query:<relationship>                                   |
| where is the [attr1] [obj1] [rel] [attr2] [obj2]?                                           | select:[obj2]→filter:[attr2]→relate:[obj1],[rel]                                                                     |
| where is the [attr1] [obj1] that [attr2] [obj2] is [rel]?                                   | →filter:[attr1]→query:<spatial-relationship>                                                                         |
| what is the [attr1] object [rel] [attr2] [obj2]?                                            | select:[obj2]→filter:[attr2]→relate:.,[rel]                                                                          |
| what is the [attr1] object that [attr2] [obj2] is [rel]?                                    | →filter:[attr1]→query:<object>                                                                                       |
| where is the [attr] [obj]?                                                                  | select:[obj]→filter:[attr]→query:<spatial-relationship>                                                              |
| what is [attr] object?                                                                      | select:.-→filter:[attr]→query:<object>                                                                               |
| does [attr] [obj] appear?                                                                   | select:[obj]→filter:[attr]→exist                                                                                     |
| is [attr1] [obj1] [rel] [attr2] [obj2]?                                                     | select:[obj1]→filter:[attr1]→relate:[obj2],[rel]<br>→filter:[attr2]→exist                                            |
| is someone [act]?                                                                           | select:[act]→exist                                                                                                   |
| which is [attr1] object [rel] [attr2] [obj2], [obj-A] or [obj-B]?                           | select:[obj2]→filter:[attr2]→relate:.,[rel]<br>→filter:[attr1]→choose:[obj-A]   [obj-B]                              |
| which is [attr1] object that [attr2] [obj2] is [rel], [obj-A] or [obj-B]?                   |                                                                                                                      |
| which is [attr] object, [obj-A] or [obj-B]?                                                 | select:.-→filter:[attr]→choose:[obj-A]   [obj-B]                                                                     |
| which [attr-type] is the [attr1] [obj1] [rel] [attr2] [obj2], [attr-A] or [attr-B]?         | select:[obj2]→filter:[attr2]→relate:[obj1],[rel]<br>→filter:[attr1]→choose:[attr-A]   [attr-B]                       |
| which [attr-type] is the [attr1] [obj1] that [attr2] [obj2] is [rel], [attr-A] or [attr-B]? |                                                                                                                      |
| which [attr-type] is the [attr] [obj], [attr-A] or [attr-B]?                                | select:[obj]→filter:[attr]→choose:[attr-A]   [attr-B]                                                                |
| is the [attr-type] of the [attr1] [obj1] the same as that of the [attr2] [obj2]?            | select:[obj1]→filter:[attr1]→select:[obj2]<br>→filter:[attr2]→compare:<[attr-type]>                                  |
| what is the same attributes of [attr1] [obj1] and [attr2] [obj2]?                           | select:[obj1]→filter:[attr1]→select:[obj2]<br>→filter:[attr2]→compare:<attribute>                                    |
| is someone [act1] before or after [act2]?                                                   |                                                                                                                      |
| is the duration of someone [act1] for longer than the duration of [act2]?                   | select:[act1]→localize:[act1]→select:[act2]<br>→localize:[act2]→compare:<time>                                       |
| is the duration of someone [act1] for shorter than the duration of [act2]?                  |                                                                                                                      |
| is [attr1] [obj1] [rel] [attr2] [obj2] and [attr3] [obj3]?                                  | select:[obj1]→filter:[attr1]→relate:[obj2],[rel]<br>→filter:[attr2]→and→relate:[obj3],[rel]<br>→filter:[attr3]→exist |
| is [attr1] [obj1] [rel] [attr2] [obj2] but not [attr3] [obj3]?                              | select:[obj1]→filter:[attr1]→relate:[obj2],[rel]<br>→filter:[attr2]→xor→relate:[obj3],[rel]<br>→filter:[attr3]→exist |

Table 4. Functional programs and their corresponding question templates. Each program consists of a sequence of predefined primary functions. The `relate` function can support the association of either subject or object. The symbol ‘.’ means traversing all objects to meet the following constraint.



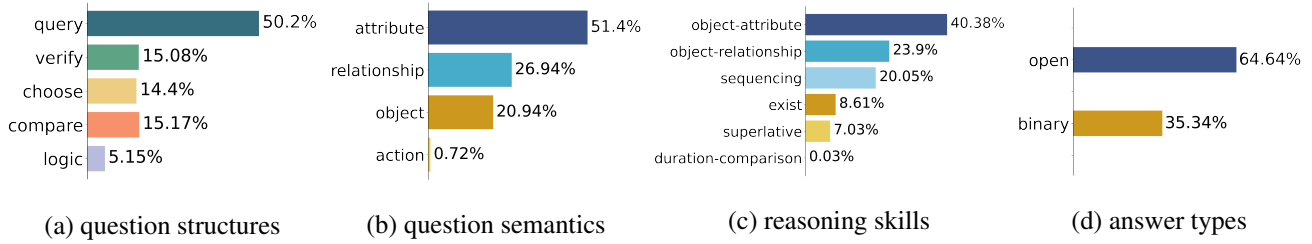

Figure 5. **Question distributions in terms of different taxonomies** on the balanced version. (a) The question structure distribution meets the expectation of our balancing strategy; (b) and (c) The attribute-related questions account for a large percentage in terms of question semantics and reasoning skills, respectively. (d) The proportion of the *open* type answers is roughly twice that of the *binary* type answers.

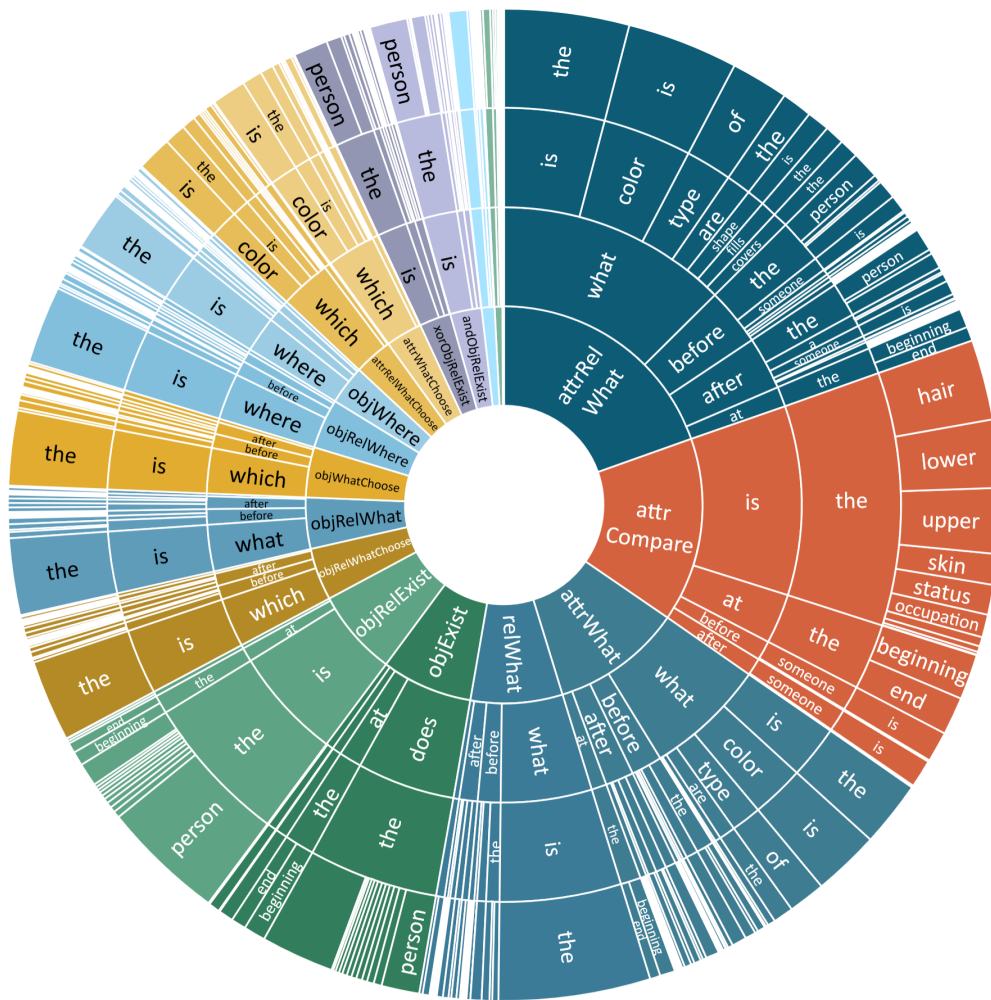

Figure 6. **Question distribution by their first three words** on the balanced benchmark. The innermost ring refers to the 21 question types. The ordering of the words starts towards the center and radiates outwards. The arc length is proportional to the number of questions containing the word. For the questions with the same structure (query, compare, verify, choose, and logic), we use the background color from the same color scheme (blue, orange, green, yellow, and purple).

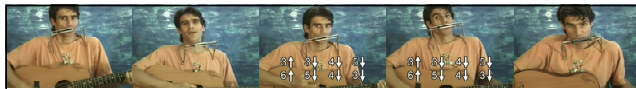

- Q1: At the end of the video, what shape is the silver harmonica that the person wearing the t-shirt is playing? A: cuboid
- Q2: Is someone playing the harmonica at the end of the video? A: yes
- Q3: Which color is the upper garment of the person who is performing, yellow or silver? A: yellow
- Q4: Is duration of someone playing the harmonica for longer than the duration of a man plays guitar and harmonica at the same time? A: yes
- Q5: Is the person wearing the yellow upper garment playing the yellow object and the white flute at the beginning of the video? A: no

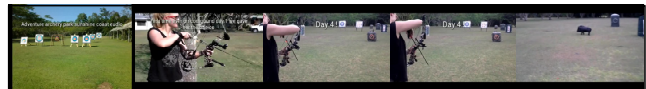

- Q1: Where is the target before someone is doing archery? A: on the field
- Q2: Is the long-haired person holding the black arrow? A: yes
- Q3: Before someone is doing archery, Which is the metal object that the person with curly hair is holding, the arrow or the scythe? A: arrow
- Q4: Before someone is doing archery, what is the same attribute of bow and black arrow? A: material
- Q5: Is the person in the vest holding the bow and the metal arrow? A: yes

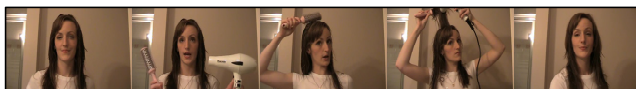

- Q1: After the lady brushes her hair, what is the relationship between the hairdryer and the person with long hair? A: the person is holding the hairdryer
- Q2: Does the straight-haired person with the watch appear in the video? A: no
- Q3: Which color is the upper garment of the person who is standing, black or grey? A: both false
- Q4: Is someone blow-drying hair before or after a lady stands in a bathroom talking? A: after
- Q5: After the lady brushes her hair, is the person with straight hair holding the silver comb but not the black brace? A: yes

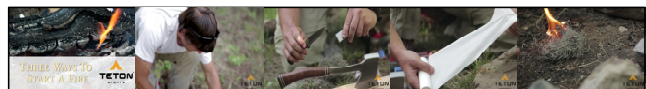

- Q1: What color is the upper garment of the brown-haired person in the t-shirt after someone is starting a campfire? A: white
- Q2: Does the curly-haired person wearing the red upper garment appear in the video? A: no
- Q3: Which color is the fire, brown or gold? A: gold
- Q4: Is the duration of someone starting a campfire for shorter than the duration of a camper describes how to make a fire? A: yes
- Q5: Is the person with brown hair holding the knife and the silver object? A: yes

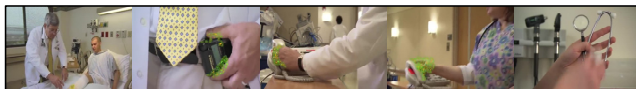

- Q1: What is the lighting green object before someone is washing hands? A: sparkle
- Q2: Is the person with the bracelet holding the phone indoors? A: no
- Q3: Which is the occupation of the person with the glasses and the necktie touching the leg, the doctor or the nail artist? A: doctor
- Q4: Is the hair color of the person who is sitting the same as that of the doctor? A: no
- Q5: Is the person holding the rectangular object and the stethoscope? A: yes

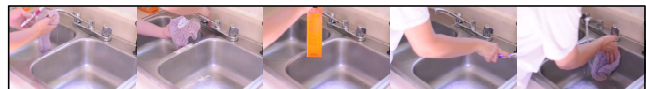

- Q1: What is the orange object filled with powder? A: baking soda
- Q2: Is the person in the white upper garment holding the white toothbrush? A: yes
- Q3: Which is the pink object that the person in the t-shirt is holding, the rag or the tarp? A: sink
- Q4: Is the material of the sink the same as that of the faucet indoors? A: yes
- Q5: Is the standing person holding the brown paint but not the pink rag? A: no

Figure 7. Example QA pairs from the train and val splits. Each example contains five QA pairs on the same video with different question structures, i.e., query, verify, choose, compare, and logic.

## References

- [1] Bernard Ghanem Fabian Caba Heilbron, Victor Escorcia and Juan Carlos Niebles. Activitynet: A large-scale video benchmark for human activity understanding. In *CVPR*, pages 961–970, 2015. [1](#)
- [2] Thao Minh Le, Vuong Le, Svetha Venkatesh, and Truyen Tran. Hierarchical conditional relation networks for video question answering. In *CVPR*, pages 9972–9981, 2020. [2](#)
- [3] Jie Lei, Linjie Li, Luwei Zhou, Zhe Gan, Tamara L Berg, Mohit Bansal, and Jingjing Liu. Less is more: Clipbert for video-and-language learning via sparse sampling. In *CVPR*, pages 7331–7341, 2021. [2](#)
- [4] Christopher D Manning, Mihai Surdeanu, John Bauer, Jenny Rose Finkel, Steven Bethard, and David McClosky. The stanford corenlp natural language processing toolkit. In *ACL*, pages 55–60, 2014. [1](#)
- [5] Alex Jinpeng Wang, Yixiao Ge, Rui Yan, Yuying Ge, Xudong Lin, Guanyu Cai, Jianping Wu, Ying Shan, Xiaohu Qie, and Mike Zheng Shou. All in one: Exploring unified video-language pre-training. *arXiv preprint arXiv:2203.07303*, 2022. [2](#)
- [6] Luwei Zhou, Yannis Kalantidis, Xinlei Chen, Jason J Corso, and Marcus Rohrbach. Grounded video description. In *CVPR*, pages 6578–6587, 2019. [1](#)
